# Supplementary material for: Developing Functional Network Connectivity of the Dorsal Anterior Cingulate Cortex Mediates Externalizing Psychopathology in Adolescents with Child Neglect
Source: bioRxiv or medRxiv preprint supplement (doi:10.1101/2021.01.29.21250544), 2021-02-01
Supplement: Supplementary file [file media-3.pdf]

**Table S1.** Paths of parallel process latent growth models to link functional connectivity between dorsal anterior cingulate cortex and bilateral anterior insula and (1) externalizing and (2) internalizing behaviors.

|                                                          | $\beta, p$ | 95% CI   |          |
|----------------------------------------------------------|------------|----------|----------|
|                                                          |            | lower CI | upper CI |
| <b>Model 1: Externalizing behavior</b>                   |            |          |          |
| Neglect $\rightarrow$ FC Intercept                       | -.05       | -.18     | .08      |
| Neglect $\rightarrow$ FC Slope                           | .02        | -.11     | .20      |
| Neglect $\rightarrow$ E Intercept                        | .12*       | .00      | .24      |
| Neglect $\rightarrow$ E Slope                            | .08        | -.08     | .23      |
| Abuse $\rightarrow$ FC Intercept                         | -.03       | -.14     | .11      |
| Abuse $\rightarrow$ FC Slope                             | -.04       | -.18     | .12      |
| Abuse $\rightarrow$ E Intercept                          | .15*       | .03      | .29      |
| Abuse $\rightarrow$ E Slope                              | .00        | -.13     | .14      |
| FC Intercept $\rightarrow$ E Slope                       | -.06       | -.20     | .10      |
| E Intercept $\rightarrow$ FC Slope                       | .06        | -.06     | .19      |
| Neglect $\rightarrow$ E Intercept $\rightarrow$ FC Slope | .01        | -.00     | .04      |
| Neglect $\rightarrow$ FC Intercept $\rightarrow$ E Slope | .00        | -.01     | .02      |
| Abuse $\rightarrow$ E Intercept $\rightarrow$ FC Slope   | .01        | -.01     | .04      |
| Abuse $\rightarrow$ FC Intercept $\rightarrow$ E Slope   | .00        | -.01     | .02      |
| <b>Model 2: Internalizing behavior</b>                   |            |          |          |
| Neglect $\rightarrow$ FC Intercept                       | -.06       | -.19     | .08      |
| Neglect $\rightarrow$ FC Slope                           | .00        | -.13     | .18      |
| Neglect $\rightarrow$ I Intercept                        | .13*       | .00      | .24      |
| Neglect $\rightarrow$ I Slope                            | .12        | -.02     | .26      |
| Abuse $\rightarrow$ FC Intercept                         | -.01       | -.14     | .11      |
| Abuse $\rightarrow$ FC Slope                             | -.01       | -.16     | .13      |
| Abuse $\rightarrow$ I Intercept                          | .14*       | .05      | .32      |
| Abuse $\rightarrow$ I Slope                              | -.00       | -.16     | .15      |
| FC Intercept $\rightarrow$ I Slope                       | .01        | -.16     | .18      |
| I Intercept $\rightarrow$ FC Slope                       | .01        | -.12     | .14      |
| Neglect $\rightarrow$ I Intercept $\rightarrow$ FC Slope | .01        | -.00     | .04      |
| Neglect $\rightarrow$ FC Intercept $\rightarrow$ I Slope | .00        | -.01     | .02      |
| Abuse $\rightarrow$ I Intercept $\rightarrow$ FC Slope   | .01        | -.01     | .04      |
| Abuse $\rightarrow$ FC Intercept $\rightarrow$ I Slope   | .00        | -.01     | .02      |

*Note.* FC = functional connectivity from dorsal anterior cingulate cortex to regions of the cingulo-opercular network, E = externalizing, I = internalizing,  $\beta$  = regression weight, CI = confidence interval,  $p(*)$  = significant paths.
